# Supplementary material for: Pattern of Functional TTX-Resistant Sodium Channels Reveals a Developmental Stage of Human iPSC- and ESC-Derived Nociceptors
Source: PubMed Central journal article supplement — Stem Cell Reports. 2015 Aug 28;5(3):305–13. doi: 10.1016/j.stemcr.2015.07.010 (PMC4618592; doi:10.1016/j.stemcr.2015.07.010), 2015-08-28
Supplement: mmc1.pdf [file mmc1.pdf]

**Stem Cell Reports**

**Supplemental Information**

**Pattern of Functional TTX-Resistant  
Sodium Channels Reveals a Developmental Stage  
of Human iPSC- and ESC-Derived Nociceptors**

**Esther Eberhardt, Steven Havlicek, Diana Schmidt, Andrea S. Link, Cristian Neacsu,  
Zacharias Kohl, Martin Hampl, Andreas M. Kist, Alexandra Klinger, Carla Nau, Jürgen  
Schüttler, Christian Alzheimer, Jürgen Winkler, Barbara Namer, Beate Winner, and  
Angelika Lampert**

**Table S1****Results of Boltzmann Fits of voltage-dependence of activation and fast inactivation**

| Activation               | HUES6 Noci     | hiPSC Noci     | NAV1.5         | NAV1.8          | NAV1.5/NAV1.8  | E14-16         | P6             |
|--------------------------|----------------|----------------|----------------|-----------------|----------------|----------------|----------------|
| Vhalf                    | -53,5 ± 2,5 mV | -49,5 ± 2,4 mV | -39,8 ± 1,0 mV | -2,1 ± 1,5 mV   |                | -26,4 ± 1,2 mV | -27,0 ± 0,9 mV |
| slope                    | 6,19 ± 0,60 mV | 7,1 ± 0,43 mV  | 8,19 ± 0,88 mV | 11,75 ± 0,54 mV |                | 9,9 ± 0,36 mV  | 4,8 ± 0,27 mV  |
| <b>Fast Inactivation</b> |                |                |                |                 |                |                |                |
| Vhalf                    | -93,0 ± 2,3 mV | -90,7 ± 1,6 mV | -79,9 ± 2,4 mV | -58,1 ± 3,7     | -73,1 ± 1,1 mV | -70,7 ± 0,9 mV | -39,7 ± 1,1 mV |
| slope                    | 9,98 ± 0,46 mV | 9,9 ± 0,81 mV  | 5,52 ± 0,49 mV | 11,05 ± 0,78 mV | 9,79 ± 0,53 mV | 14,4 ± 1,46 mV | 4,9 ± 0,21 mV  |

**Table S2****Primers used for amplification of human and rat genes**

| Genes                      | Accession number (NCBI) or citation | Primer                                                                  |
|----------------------------|-------------------------------------|-------------------------------------------------------------------------|
| human genes                |                                     |                                                                         |
| <i>SCN1A</i> (NAV1.1)      | Candenas et al., 2006               | for: 5'-GAAGAACAGCCCGTAGTGGA-3'<br>rev: 5'-TTCAAATGCCAGAGCACCA-3'       |
| <i>SCN2A</i> (NAV1.2)      | Candenas et al., 2006               | for: 5'-GAAGGCAAAGGGAACTCTGG-3'<br>rev: 5'-CAGTGAGACATCAACAATCAGGAAG-3' |
| <i>SCN5A</i> (NAV1.5)      | Candenas et al., 2006               | for: 5'-CCGCCATTTACACCTTTGAGT-3'<br>rev: 5'-CGCTGAGGCAGAAGACTGTG-3'     |
| <i>SCN8A</i> (NAV1.6)      | NM_014191.3                         | for: 5'-ACAATGTTGGGGCAGGATAC-3'<br>rev: 5'-GGTGAAGAAGGAGCCGAAG-3'       |
| <i>SCN9A</i> (NAV1.7)      | NM_002977.3                         | for: 5'-ACCTATCTCTGCTTCAAGTTGC-3'<br>rev: 5'-TGGGCTGCTTGTCTACATTAAC-3'  |
| <i>SCN10A</i> (NAV1.8)     | NM_006514.2                         | for: 5'-CTGTCGATGTCTCGGCATTC-3'<br>rev: 5'-TGGGCACTTCTGTTCCAGACTC-3'    |
| <i>SCN11A</i> no1 (NAV1.9) | NM_014139.2                         | for: 5'-GAAATGCTTACCTCGCTCTG-3'<br>rev: 5'-GCTCTCAAACCTCTGGCTGTTG-3'    |
| <i>P2RX3</i>               | NM_002559.3                         | for: 5'-TCCCCAGGCTACAACCTTCAG-3'<br>rev: 5'-TGTTGAACTTGCCAGCATT-3'      |
| <i>TRPV1</i>               | NM_080704.3                         | for: 5'-GCACAGGAGAGCAAGAATC-3'<br>rev: 5'-GTCCAGTTCACCTCGTCCAC-3'       |
| <i>GAPDH</i>               | NM_002046.4                         | for: 5'-GTCGGAGTCAACGGATTTG-3'<br>rev: 5'-TGGGTGGAATCATATTGGAAC-3'      |
| <i>HPRT1</i>               | NM_000194.2                         | for: 5'-CCTGGCGTCGTGATTAGTG-3'<br>rev: 5'-TCCCATCTCCTTCATCACATC-3'      |
| <i>B2M</i>                 | NM_004048.2                         | for: 5'-GAGGCTATCCAGCGTACTCC-3'<br>rev: 5'-AATGTCGGATGGATGAAACC-3'      |

| rat genes              |             |                                                                    |
|------------------------|-------------|--------------------------------------------------------------------|
| <i>Scn5a</i> (Nav1.5)  | NM_013125.2 | for: 5'-TCGAGACCATGTGGGACTG-3'<br>rev: 5'-AGCAAGGCCAAGAAGAGATTC-3' |
| <i>Scn9a</i> (Nav1.7)  | NM_133289   | for: 5'-CTTGAGGGATCCAAAGATG-3'<br>rev: 5'-TTTCTGCCAGCCTTCACAC-3'   |
| <i>Scn10a</i> (Nav1.8) | NM_017247.1 | for: 5'-AACGAACCTTTCCGAGCAC-3'<br>rev: 5'-GGTGGGCACTTCAGCTTAG-3'   |
| <i>Scn11a</i> (Nav1.9) | NM_019265.2 | for: 5'-GGCAGCCAAGTCAATCTTTC-3'<br>rev: 5'-TGAGGACCATCACGTCTACC-3' |
| <i>Gapdh</i>           | NM_017008.4 | for: 5'-CCTGGAGAAACCTGCCAAG-3'<br>rev: 5'-CCCAGGATGCCCTTTAGTG-3'   |
| <i>Hprt1</i>           | NM_012583.2 | for: 5'-TCCCAGCGTCGTGATTAG-3'<br>rev: 5'-TCGAGCAAGTCTTTCAGTCC-3'   |
| <i>B2m</i>             | NM_012512.2 | for: 5'-GTGCTTGCCATTCAGAAAAC-3'<br>rev: 5'-AGTTGAGGAAGTTGGGCTTC-3' |

#### Supplemental References

Candenas, L., M. Seda, P. Noheda, H. Buschmann, C. G. Cintado, J. D. Martin and F. M. Pinto (2006).  
 "Molecular diversity of voltage-gated sodium channel alpha and beta subunit mRNAs in human tissues."  
Eur J Pharmacol **541**(1-2): 9-16.
